# A chromosome-scale assembly of the major African malaria vector *Anopheles funestus*

Jay Ghurye<sup>1,2</sup>, Sergey Koren<sup>2</sup>, Scott T. Small<sup>3</sup>, Seth Redmond<sup>4,5</sup>, Paul Howell<sup>6,†</sup>, Adam M. Phillippy<sup>2,\*</sup>, and Nora J. Besansky<sup>3,\*</sup>

<sup>1</sup> Department of Computer Science, University of Maryland, College Park, MD

<sup>2</sup> Genome Informatics Section, Computational and Statistical Genomics Branch, National Human Genome Research Institute, National Institute of Health, Bethesda, MD

<sup>3</sup> Department of Biological Sciences, University of Notre Dame, South Bend, IN

<sup>4</sup> Infectious Disease and Microbiome Program, Broad Institute, Cambridge, MA

<sup>5</sup> Department of Immunology and Infectious Disease, Harvard TH Chan School of Public Health, Boston, MA

<sup>6</sup> Centers for Disease Control, Atlanta, GA

<sup>†</sup> Current affiliation: Verily Life Sciences, San Francisco, CA

\* Corresponding Authors

# Abstract

**Background:** *Anopheles funestus* is one of the three most consequential and widespread vectors of human malaria in tropical Africa. However, the lack of a high-quality reference genome has hindered the association of phenotypic traits with their genetic basis in this important mosquito.

**Findings:** Here we present a new high-quality *An. funestus* reference genome (AfunF3) assembled using 240x coverage of long-read single-molecule sequencing for contigging, combined with 100x coverage of short-read Hi-C data for chromosome scaffolding. The assembled contigs total 446 Mbp of sequence and contain substantial duplication due to alternative alleles present in the sequenced pool of mosquitos from the FUMOS colony. Using alignment and depth-of-coverage information, these contigs were deduplicated to a 211 Mbp primary assembly, which is closer to the expected haploid genome size of 250 Mbp. This primary assembly consists of 1,053 contigs organized into 3 chromosome-scale scaffolds with an N50 contig size of 632 kbp and an N50 scaffold size of 93.811 Mbp, representing a 100-fold improvement in continuity versus the current reference assembly, AfunF1.

**Conclusion:** This highly contiguous and complete *An. funestus* reference genome assembly will serve as an improved basis for future studies of genomic variation and organization in this important disease vector.

# Data Description

## Introduction and Background

Many insect genomes remain a challenge to assemble, and mosquito genomes have proven particularly difficult due to their repeat content and structurally dynamic genomes. These issues are compounded by the requirements of long-read sequencing technologies that typically require >10 µg of DNA for library construction. As a result, it is often impossible to construct a sequencing library from a single individual. Instead, sequencing a pool of individuals from an inbred population has been required [1]. For species that are amenable to extensive inbreeding, this approach has led to reference-grade genomes directly from the assembler [2]. However, when inbreeding is not possible, the sequenced pool of individuals can carry population variation that fragments the resulting assembly. In this case, instead of assembling a single genome, the assembler must reconstruct some unknown number of variant haplotypes.

Motivated by the goal of genome-enabled malaria control, a large international consortium previously sequenced and assembled the genomes of 16 *Anopheles* species using short-read Illumina sequencing [3,4]. Although these draft assemblies represented a crucial first step, their potential for 1) understanding and manipulating vectorial capacity traits, 2) inferring how key vector adaptations to hosts and habitats have arisen and are maintained, and 3) accurately defining vector breeding units and migration between them is constrained by two major limitations. First, many of these *Anopheles* assemblies are highly fragmented collections of relatively short scaffolds, causing gene annotation problems such as missing genes, missing exons, and genes split between scaffolds or sequencing gaps. Thus, one of the consequences of fragmented assemblies is that it is difficult to estimate gene copy number, which may be

linked to important phenotypic traits (e.g. insecticide resistance) [5,6]. Genes of particular interest with respect to arthropod disease vectors (e.g., cytochrome P450s and odorant/gustatory receptors) may be especially prone to annotation errors, as many belong to gene families whose members are often physically clustered into tandem arrays.

A second major limitation of fragmented insect assemblies is that they are rarely scaffolded into chromosomes, owing to difficulty and lack of funding for physical or linkage mapping. Among other consequences, the unknown placement of scaffolds along chromosome arms means that their position within or outside of chromosomal inversions is difficult or impossible to determine. Many anopheline species are highly polymorphic for chromosomal inversions, which tend to occur disproportionately on particular chromosome arms [7–9]. In a heterozygote carrying one inverted and one uninverted chromosome, recombination between the reversed chromosomal segments is greatly reduced [10], creating cryptic population structure that can cause spurious associations in GWAS [11] and mislead recombination-based inference of selection and gene flow [12,13]. Importantly, chromosomal inversions also directly or indirectly influence traits affecting malaria transmission intensity—anopheline biting and resting behavior [14,15], seasonality [16], aridity tolerance [14,17–21], ecological plasticity [22,23] morphometric variation [24], and *Plasmodium* infection rates [25,26]. Thus, correct population genomic and GWAS inferences depend upon knowing the location of a marker in the genome.

*Anopheles funestus* is one of the three most important and widespread vectors of human malaria in tropical Africa [27–30], and unlike *Anopheles gambiae* with which it broadly co-occurs, it is a relatively neglected species. It is considered even more highly anthropophilic and endophilic than *An. gambiae* and amenable to conventional indoor-based vector control such as bed nets and indoor spraying of houses with residual insecticides. Indeed, historical house spraying campaigns in eastern and southern Africa not only locally eliminated this species, but

the effect was maintained for several years following the cessation of spraying, due to the apparent inability of *An. funestus* to recolonize some areas. Likewise, *An. funestus* was eliminated from a humid forest and degraded forest areas in West Africa where malaria is meso- or hypoendemic [31]. However, in the savanna environment of West Africa where malaria is holo- or hyperendemic, similar historical indoor spraying campaigns failed to eliminate the species. Exophilic populations persisted which—despite marked anthropophily—continued to feed outdoors on cattle but also entered sprayed houses to bite humans. Today, the situation is worsened by the emergence and spread of insecticide resistance in this species [29,32–34].

Mastery over malaria will require tackling *An. funestus*, but it remains understudied; information on its behavior and genetics lags far behind *An. gambiae*. At least part of the reason for its neglect may be the historical lack of laboratory colonies, a problem solved with the establishment of the FUMOS colony and its registration with the Anopheles program of BEI Resources (<https://www.beiresources.org/AnophelesProgram.aspx>). *An. funestus* shares with *An. gambiae* not only a broad sub-Saharan distribution and major vector status but also abundant chromosomal inversion polymorphism and shallow range-wide population structure [35]. However, there are behavioral and genetic heterogeneities relevant to malaria transmission that remain poorly understood. In West Africa, strong cytogenetic evidence points to cryptic, temporally stable assortatively mating populations co-occurring in the same villages [36–39]. These chromosomally recognized forms of *An. funestus*, named Kiribina and Folonzo, seem to differ in larval ecology and—importantly—they also differ in adult behaviors affecting vectorial capacity, most notably indoor resting behavior. Mechanistic understanding of the genomic determinants of these and other epidemiologically important phenotypic and behavioral traits ultimately depends on upgrading the *An. funestus* reference to a chromosome-based assembly in which the unanchored scaffolds are united, ordered and oriented on chromosome arms.

# Chromosome-scale assembly of *Anopheles funestus*

To achieve a complete and highly contiguous assembly of the *An. funestus* genome (AfunF3), we first assembled contigs from long, single-molecule reads, and then scaffolded these contigs into chromosome-scale scaffolds using Hi-C proximity ligation data. A similar strategy was recently used to improve the genome of *Aedes aegypti* [40]. An initial assembly of the long-read data alone (AfunF3 contigs) yielded a contig N50 size of 94.05 kbp (N50 such that 50% of assembled bases are in contigs of this size or greater) and extensive haplotype separation as evidenced by an inflated assembly size of 446.04 Mbp and a high rate of core gene duplications (48%) as measured by BUSCO [41]. These alternative alleles likely derive from natural variation circulating within the sequenced FUMOS colony, as the DNA from a pool of adult mosquitoes was required for PacBio library preparation. Identifying and removing duplicate contigs via an all-vs-all alignment reduced the primary assembly size to 211.75 Mbp and improved the N50 size to 631.72 kbp (Table 1).

The primary set of contigs (excluding alternative alleles) was then scaffolded using Hi-C Illumina reads to first bin the contigs into 3 chromosomes, followed by ordering and orientation of the contigs using the Proximo method (Phase Genomics, Seattle WA). The final scaffolded assembly (AfunF3 primary) contains 210.82 Mbp of sequence and a scaffold N50 of 93.81 Mbp. The resulting scaffolds represent the entirety of the three *An. funestus* chromosomes: 2, 3, and X (Figure 1).

Because single-molecule PacBio data is prone to insertion and deletion errors, all AfunF3 contigs were polished twice with Arrow [42] using the signal-level PacBio data and once with Pilon [43] using paired-end Illumina data from the same FUMOS colony. Because Illumina-based polishing tools typically do not correct bases that appear heterozygous in the read set,

we anticipated that variation in the FUMOS colony would prevent the correction of variant bases. To help address this issue, we finally polished the assembly using 10X Genomics Illumina data obtained from an individual mosquito. As an independent test of base accuracy, we compared our new assembly (AfunF3 primary) and the prior assembly (AfunF1) to a 10X Genomics dataset from a different individual mosquito. The average Phred-scaled quality value [44] of the new assembly was estimated as QV28 versus QV23 for the Illumina-based AfunF1 assembly. This independent data indicates a higher average accuracy for the new assembly, but also revealed significant diversity within the colony. For example, calling variants using 10X Genomics data for two different mosquitoes yielded widely different SNP counts (92,759 vs. 177,428).

We next evaluated the structural accuracy of the AfunF1 and AfunF3 assemblies by measuring their agreement with the raw PacBio reads. The intermediate assembly AfunF2 [45] was assembled before collection of all PacBio and Hi-C data, and so was deemed redundant and excluded from these analyses. When compared to the raw data, the AfunF3 primary assembly had fewer called structural differences (insertions, deletions, duplications, and inversions) than AfunF1 (Table 2). Despite the substantial single-nucleotide polymorphism observed within the FUMOS colony, no large polymorphic inversions could be identified from the combined PacBio, Hi-C, and 10X Genomics data. Comparison of the chromosome-scale AfunF3 primary assembly versus the *An. gambiae* reference genome (AgamP4) confirmed a known reciprocal whole-arm translocation between 2L and 3R, as well as substantial intra-chromosomal shuffling (Figure 2). AfunF3 contigs also had fewer fragmented BUSCO core genes and a similar number of complete BUSCOs compared to AfunF1 (Table 2), but also a high rate of duplication. The AfunF3 primary scaffolds reduce duplication at the expense of lower BUSCO completeness.

To further evaluate AfunF3's suitability as an updated reference for *An. funestus*, we mapped RNA-Seq expression data to the assemblies and computed the number of concordant paired-end reads. A better assembly is expected to have both a higher fraction of mapped reads (completeness) as well as a higher fraction of correctly spaced and oriented pairs (structural accuracy). Both AfunF3 assemblies have better agreement of mapped read pairs as well as a higher overall mapping rate versus the AfunF1 assembly (Table 2). The AfunF3 contigs do have a higher rate of multi-mapping RNA-Seq reads, but this is reduced in the primary assembly while preserving the high mapping rate. In addition to a higher mapping rate, more complete transcripts were mapped to single contigs within the long-read assemblies. The average number of complete transcripts contained per contig was 67.38 for AfunF3 primary versus 5.28 for the AfunF1 assembly. These results demonstrate the greater continuity of the updated assembly, which provides sequence-resolved reconstructions of many *An. funestus* intergenic regions for the first time.

## Discussion

*Anopheles funestus* is one of the leading vectors of malaria and understanding the organization and function of its genome is key to controlling this deadly disease. Here we described a chromosome-scale assembly of the *An. funestus* genome using multiple sequencing technologies and assembly methods. The tremendous improvement in the completeness and contiguity of its genome will provide a valuable resource for future genomic analyses and functional characterization of this important species and enable a mechanistic understanding of the genomic determinants of epidemiologically important phenotypic and behavioral traits.



# Materials and Methods

## Library preparation and sequencing

A gravid female mosquito of the FUM0Z colony was allowed to lay eggs, and her offspring were inbred for a single generation. From this, an isofemale line was grown and DNA extracted from the adult females for sequencing with PacBio and Hi-C. 46 SMRT cells of PacBio RSII sequencing using the P6-C4 chemistry were run by the core facility at the Icahn School of Medicine at Mount Sinai (New York, NY), resulting in 173X coverage (assuming a 250 Mbp genome size). A previous study generated 70X coverage of the same colony using the older PacBio P5-C3 chemistry sequencing [45]. This older data was combined with the additional 173X coverage, totaling 60.95 Gb of long-read data in 10.93 million sequences (average length 5.6 kb, N50 read length 8.4 kb) and an estimated total coverage of 234X. Two Hi-C libraries were prepared and sequenced (one from mixed-sex larvae, the second from adult females) by Phase Genomics (Seattle, WA), resulting in ~100X coverage of Illumina Hi-C data containing ~187 million 80 bp paired-end Illumina reads.

## Assembly and scaffolding

PacBio contig assembly was performed with Canu v1.3 [46] using parameters: corOutCoverage=100 genomeSize=250m errorRate=0.013 batOptions="-dg 3 -db 3 -dr 1 -ca 500 -cp 50". The resulting contigs were then polished with Arrow [42] using default parameters and the P6-C4 PacBio signal data (because Arrow does not support the older P5-C3 data). After polishing, the assembly was separated into primary and alternative contigs to remove unnecessarily duplicated alleles from the AfunF3 contigs. This was performed using two different approaches. First, contigs containing at least one complete BUSCO gene were identified. For each BUSCO gene, if it was found contained in two or more contigs, the contig

with the highest alignment score was kept as the primary. Next, all contigs not containing a BUSCO gene but assembled with high coverage (>40X) were added to the primary set.

To order and orient the primary contigs along the chromosomes, Hi-C reads were aligned using Bowtie2 [47] and scaffolding using Proximo (Phase Genomics, Seattle WA). Scaffold gaps spanned by PacBio reads were filled using PBJelly [48]. This assembly was again run through Arrow to polish the sequences inserted by PBJelly and fill any remaining short gaps. The Hi-C assembled scaffolds were then aligned using NUCmer [49] to the AfunF1 contigs for validation and the alignments visualized using Circos [50] and mummerplot. This identified a mis-join of chromosomes 3R and X, which was manually corrected. Additional manual curation using mapped transcripts, FISH probes [45], and comparison to AfunF1 scaffolds identified a few additional inversion errors in the scaffolds, mainly on distal 2L. Visual inspection of the Hi-C data showed clear signatures of scaffolding error. These errors were corrected by manually extracting the region and placing the sequence at the correct locus, as indicated by the Hi-C interactions. After these corrections, the scaffolded chromosomes (AfunF3 primary) show good agreement with the Hi-C data (Figure 3).

As diploid and population variation introduces indels in the Arrow polishing process [51], the final assemblies were also polished by Pilon using paired-end Illumina data (NCBI SRA accession numbers: SRX209628 and SRX209387) and 10X Genomics Illumina data from a single individual (NCBI SRA accession number: SRX4819916). The paired-end Illumina data was mapped using BWA-MEM [52] and the 10X Genomics data mapped using Lariat [53] in a barcode-aware manner, as to improve the mapping quality. Consensus quality of the final assemblies was then estimated using an independent 10X Genomics dataset (NCBI SRA accession number: SRX4819903) of a different mosquito of the same FUM0Z colony. Based on the alignment of reads to the assembly, variants were called using freebayes (parameters: -C 2

-O -q 20 -z 0.10 -E 0 -X -u -p 2 -F 0.5), and the assembly QV was estimated using called homozygous variants (i.e. positions where nearly all Illumina reads agreed with each other yet disagreed with the assembly).

## Validation

To check for the presence of contamination, assembled contigs were classified using Kraken [54] using a custom database including all microbial RefSeq genomes and all available mosquito genomes. Most of the assembled sequence (96.00%) was classified as *An. funestus* or Culicidae. The remaining sequences were primarily unannotated or annotated at a higher taxonomic level (3.76%), from possible bacterial/human sources (0.24%, 32 contigs), and had slightly lower GC content (Figure 4). However, none of these contigs were called contaminants by NCBI's independent contamination check and so all contigs were included in the submitted assembly to avoid excluding novel mosquito sequence missing from the prior draft assemblies.

The structural accuracy of the assemblies was evaluated by mapping raw PacBio reads and calling structural variants. PacBio reads were aligned to each assembly using NGMLR [55] with parameters: -t 16 -x pacbio --skip-write. Using these alignments, variants were called using Sniffles [55] with parameters: -t 32 -s 10 -f 0.25. Variants were then filtered to avoid capturing heterozygous population variants such that variants for which the alternate variant had  $\geq 45$  supporting reads and the assembly variant had  $< 10$  supporting reads were called as assembly errors.

Paired-end RNA-Seq for the *An. funestus* FUM0Z colony were downloaded from NCBI under accession SRR826832. These reads were aligned to all assemblies using the HISAT2 aligner [56] and assembled into transcripts using Trinity [57] with default parameters. The assembled transcripts were then mapped to all assemblies using GMAP [58]. Transcripts were required to

be aligned over 90% of their length to a single contig to be considered “complete” in the assembly.

## Availability of supporting data

Raw genomic sequence reads are available in the NCBI Sequence Read Archive under project accession PRJNA494870. This Whole Genome Shotgun project has been deposited at DDBJ/ENA/GenBank under the accession RCWQ000000000. The version described in this paper is version RCWQ01000000.

## Declarations

### List of abbreviations

BUSCO: Benchmarking Universal Single-Copy Ortholog; PacBio: Pacific Biosciences; RNA-Seq: RNA-sequencing; NCBI: National Center for Biotechnology Information; SRA: Sequence Read Archive

### Ethics approval and consent to participate

Not applicable.

### Consent for publication

Not applicable.

## Competing interests

The author(s) declare that they have no competing interests.

## Funding

Physical mapping and data production were supported by the United States (US) National Institutes of Health (NIH) National Institute of Allergy and Infectious Diseases (NIAID) grant R21 AI112734 to NJB. STS and NJB received support from NIAID grant R21 AI123491 and Target Malaria, which receives core funding from the Bill & Melinda Gates Foundation and from the Open Philanthropy Project Fund, an advised fund of Silicon Valley Community Foundation. JG, SK, and AMP were supported by the Intramural Research Program of the National Human Genome Research Institute, National Institutes of Health. This work utilized the computational resources of the NIH HPC Biowulf cluster (<https://hpc.nih.gov>).

## Authors' contributions

AMP and NJB conceived and coordinated the project. JG, SK, STS, and AMP performed the genome assembly, validation, and comparative analyses. SR provided the 10X Genomics data and analysis. PH provided FUMOS samples for sequencing. JG, AMP, and NJB drafted the manuscript. All the authors have read and approved the manuscript.

## Acknowledgments

The authors thank Ivan Liachko and Shawn Sullivan of Phase Genomics for assistance with Hi-C libraries and scaffolding, Robert Sebra of Mount Sinai for assistance with the PacBio sequencing, Igor Sharakhov of Virginia Tech for early access to the *An. funestus* FISH mapping data, and Rob Waterhouse of the University of Lausanne and Swiss Institute of Bioinformatics for assistance with Circos.

## Figures

Figure 1: Circos plot comparing the AfunF1 assembly of *An. funestus* to the updated AfunF3 assembly. AfunF1 scaffolds (colored half of the outer ring) are ordered by majority alignment location onto AfunF3 (black half of the outer ring). Connecting lines indicate pairwise alignments between the two assemblies, and crossing lines indicate that part of the AfunF1 scaffold aligns to discordant regions on the AfunF3 chromosome. The first internal ring color correspond to the AfunF1 scaffold color. The second internal ring represents the orientation of the AfunF1 scaffolds onto AfunF3, where orange is forward and green is reverse.

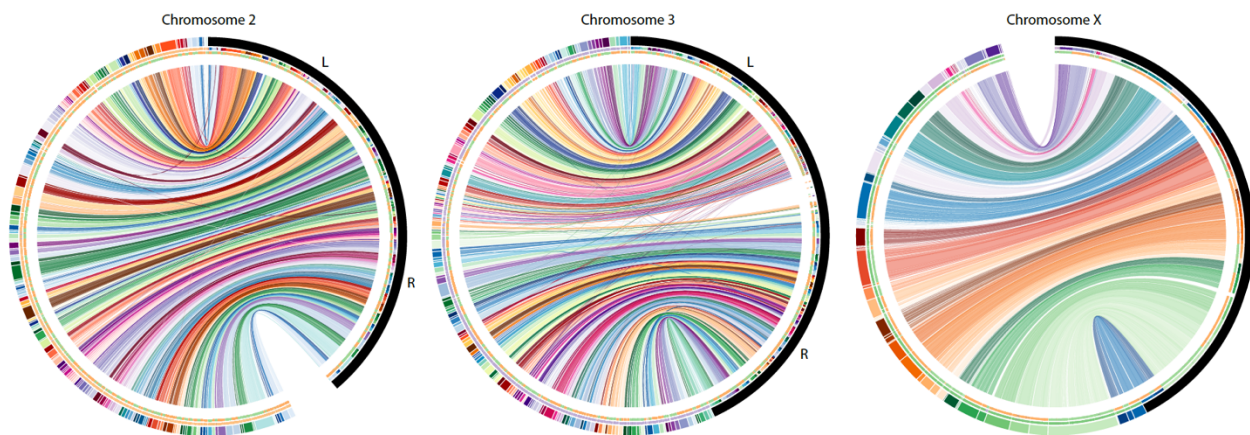



315 Figure 2: Hi-C interaction map for assembled *An. funestus* scaffolds generated using  
 316 the Juicebox Hi-C visualization program [59]. Darker colors indicate a higher frequency  
 317 of chromatin interaction. The plot shows clear separation of chromosome boundaries  
 318 and limited off-diagonal interactions, supporting the global structure of the chromosome-  
 319 scale scaffolds.

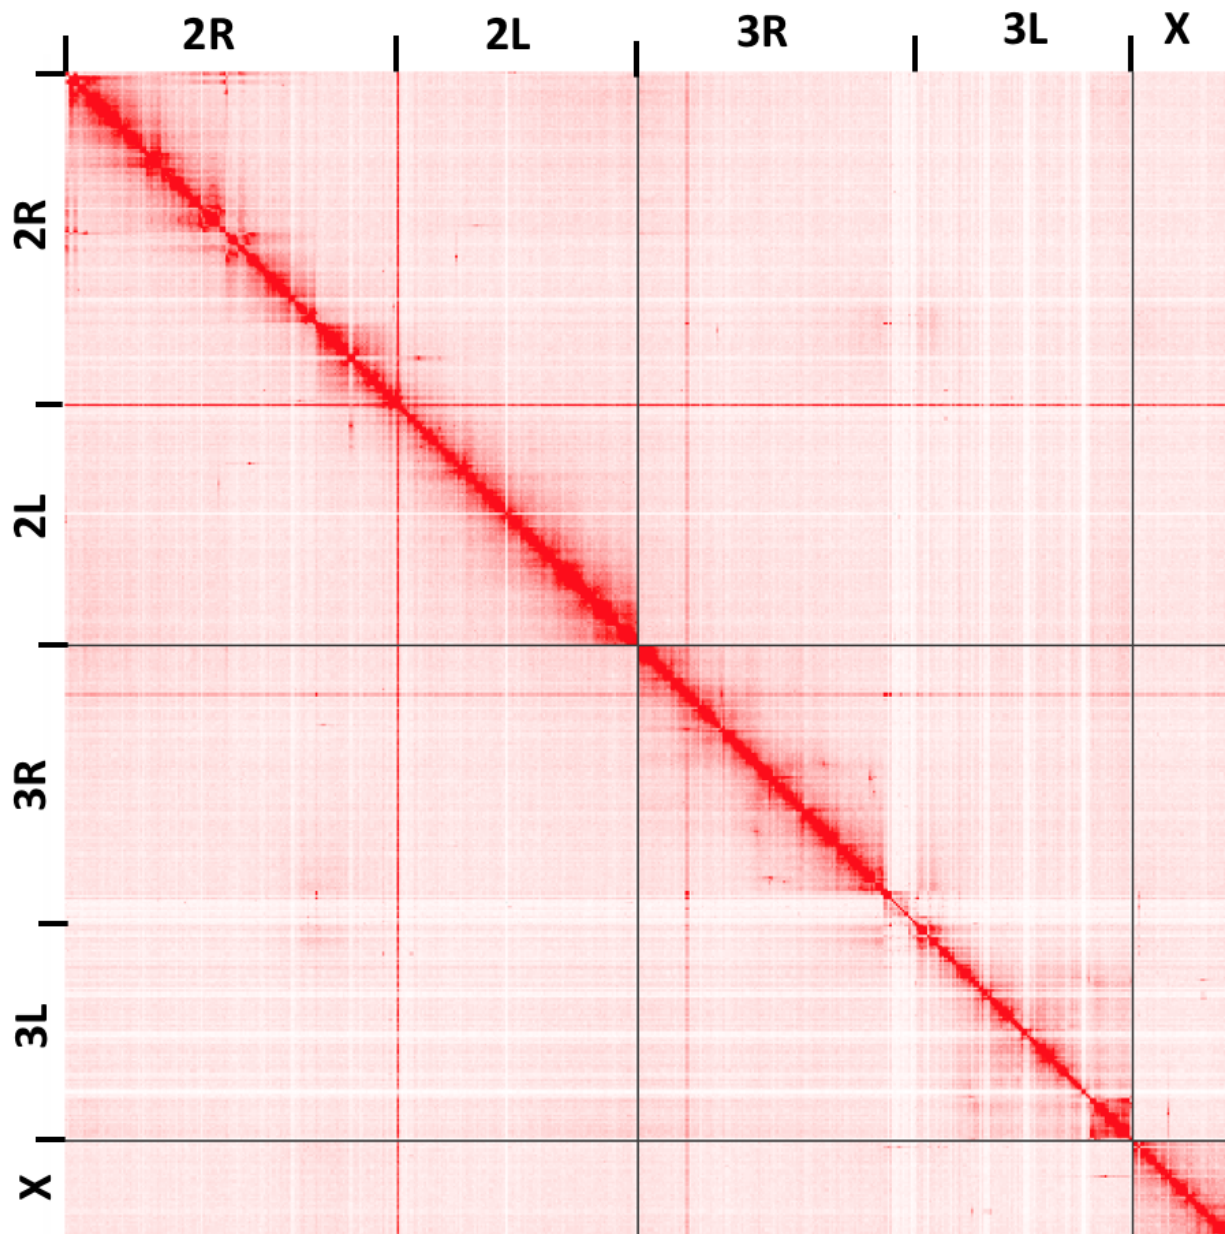

Figure 3: Whole genome alignment dotplot for *Anopheles funestus* and *Anopheles gambiae* genomes generated using D-GENIES [60]. A dot in the plot corresponds to a match between the corresponding genomic positions indicated on the axes. The *An. gambiae* reference genome is displayed on the x-axis, and the *An. funestus* AfunF3 primary assembly on the y-axis. A reciprocal whole-arm translocation between 2L and 3R is apparent, as well as substantial intra-chromosomal shuffling between these genomes.

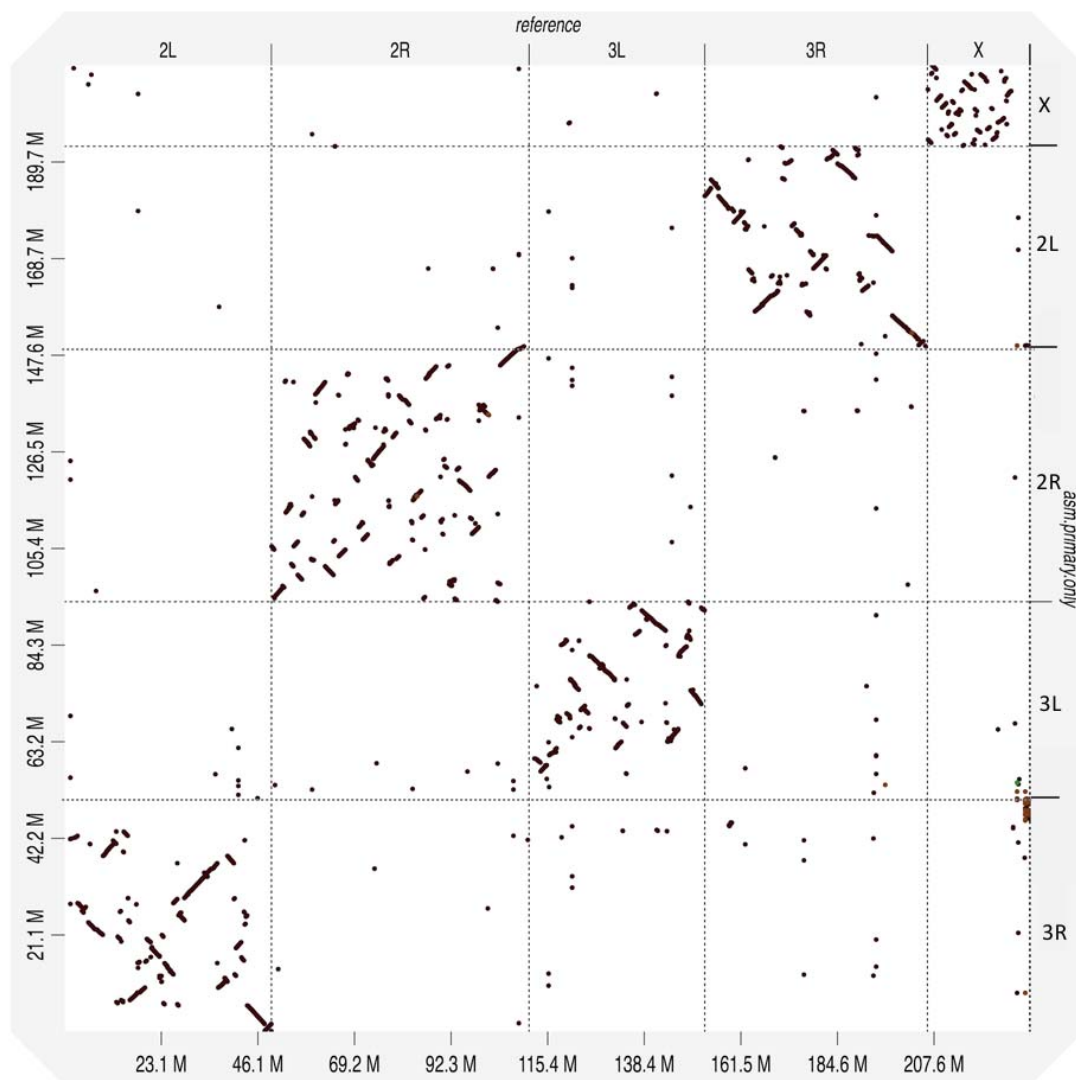



Figure 4: GC content versus coverage plot for all assembled *An. funestus* contigs. The orange points denote the contigs classified by Kraken as *An. funestus* and green points denote everything else. A majority of the contigs are classified as *An. funestus* by Kraken and there is no indication of extensive contamination.

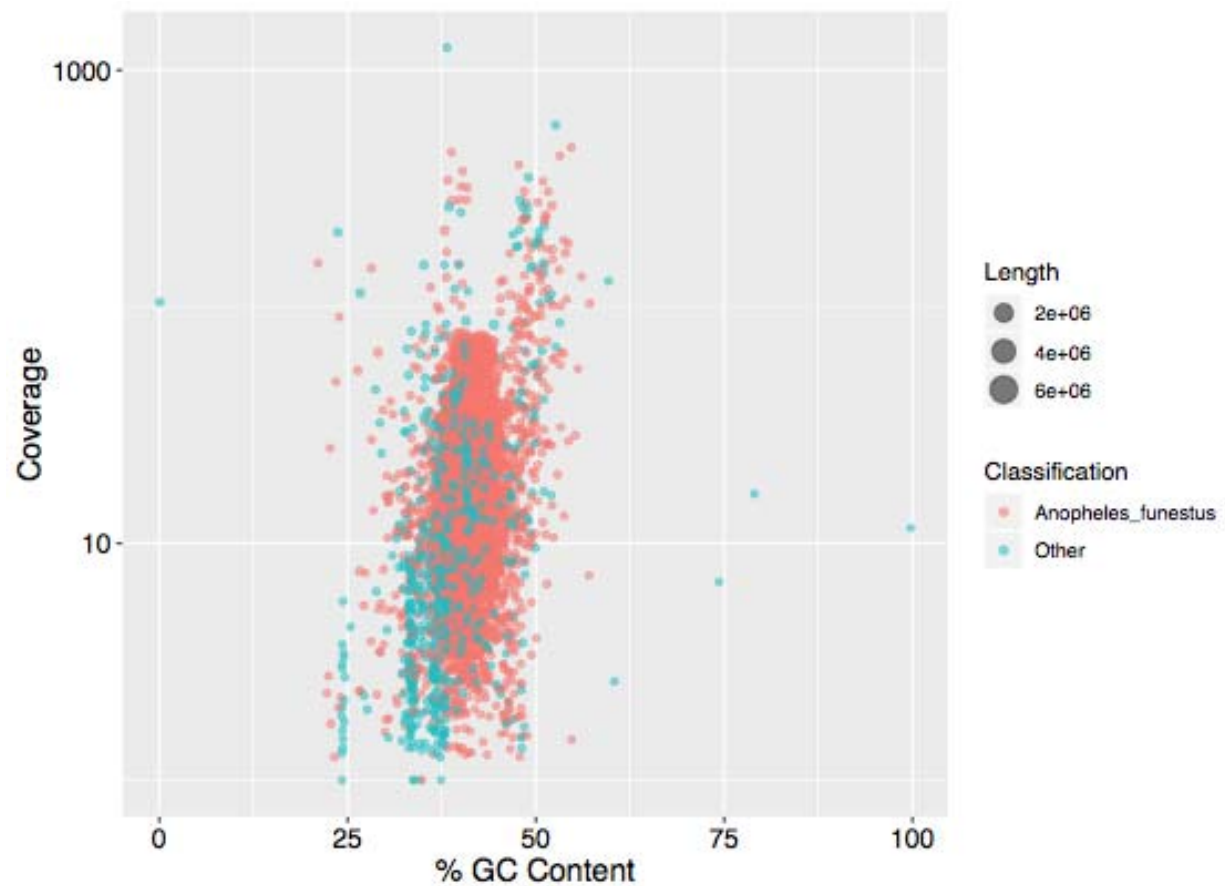

## Tables

Table 1: Assembly statistics for the *An. funestus* genome. *AfunF1* represents the prior reference assembly, *AfunF3 contigs* denotes the complete long-read assembly with all contigs included and *AfunF3 primary* denotes the assembly after deduplication and scaffolding. QV(Illumina) denotes the assembly QV estimated using Illumina data and QV(10X) denotes the 10X Genomics data. QV(Illumina) is highest for the *AfunF1* assembly, because it is the same data used to generate that assembly, whereas QV(10X) is based on data from a single mosquito of the same FUM0Z colony.

| Assembly       | Number of Contigs | Contig N50 | Max Contig Size | Number of Scaffolds | Scaffold N50 | Max Scaffold size | Total Assembly Size | QV (Illumina) | QV (10X) |
|----------------|-------------------|------------|-----------------|---------------------|--------------|-------------------|---------------------|---------------|----------|
| AfunF1         | 9,880             | 60,925     | 563,645         | 1,392               | 671,960      | 3,832,769         | 225,223,604         | 38.93         | 22.69    |
| AfunF3 contigs | 10,245            | 94,259     | 7,564,979       | 9,175               | 238,902      | 99,362,816        | 446,039,041         | 29.82         | 28.18    |
| AfunF3 primary | 1,053             | 631,722    | 7,564,979       | 3                   | 93,811,348   | 99,362,816        | 210,827,327         | 24.94         | 25.82    |

Table 2: Validation of *An. funestus* genome assemblies using BUSCO gene set completeness, agreement of the assemblies with RNA-Seq transcriptome data, and structural accuracy inferred using PacBio long read data. *AfunF1* represents the prior reference assembly, *AfunF3 contigs* denotes the complete long-read assembly with all contigs included and *AfunF3 primary* denotes the assembly after deduplication and scaffolding. For BUSCO categories C denotes “Complete Genes”, S denotes “Single Copy Genes”, D denotes “Duplicated Genes”, F denotes “Fragmented Genes”, and M denotes “Missing Genes”. For long reads based structural variation, DEL denotes deletions, DUP denotes duplications, INV denotes inversions, and INS denotes insertions.

| Assembly       | BUSCO statistics |       |    |    | Transcriptome data statistics |                    |                                  | Structural variants called with long reads |     |     |       |
|----------------|------------------|-------|----|----|-------------------------------|--------------------|----------------------------------|--------------------------------------------|-----|-----|-------|
|                | C/S              | C/D   | F  | M  | Alignment Rate                | Multi-mapped reads | % Transcripts in a single contig | DEL                                        | DUP | INV | INS   |
| AfunF1         | 2,756            | 16    | 27 | 16 | 81.79%                        | 23.92%             | 84.96%                           | 9,036                                      | 455 | 152 | 3,798 |
| AfunF3 contigs | 2,765            | 1,068 | 18 | 17 | 84.34%                        | 36.97%             | 91.16%                           | NA                                         | NA  | NA  | NA    |
| AfunF3 primary | 2,685            | 54    | 30 | 81 | 84.86%                        | 27.03%             | 89.40%                           | 571                                        | 6   | 10  | 702   |

## References

1. Kim KE, Peluso P, Babayan P, Yeadon PJ, Yu C, Fisher WW, et al. Long-read, whole-genome shotgun sequence data for five model organisms. *Sci Data*. 2014;1:140045.
2. Berlin K, Koren S, Chin C-S, Drake JP, Landolin JM, Phillippy AM. Assembling large genomes with single-molecule sequencing and locality-sensitive hashing. *Nat Biotechnol*. 2015;33:623–30.
3. Neafsey DE, Christophides GK, Collins FH, Emrich SJ, Fontaine MC, Gelbart W, et al. The evolution of the Anopheles 16 genomes project. *G3*. 2013;3:1191–4.
4. Neafsey DE, Waterhouse RM, Abai MR, Aganezov SS, Alekseyev MA, Allen JE, et al. Mosquito genomics. Highly evolvable malaria vectors: the genomes of 16 Anopheles mosquitoes. *Science*. 2015;347:1258522.
5. Assogba BS, Milesi P, Djogbénou LS, Berthomieu A, Makoundou P, Baba-Moussa LS, et al. The ace-1 Locus Is Amplified in All Resistant Anopheles gambiae Mosquitoes: Fitness Consequences of Homogeneous and Heterogeneous Duplications. *PLoS Biol*. 2016;14:e2000618.
6. Weetman D, Djogbenou LS, Lucas E. Copy number variation (CNV) and insecticide resistance in mosquitoes: evolving knowledge or an evolving problem? *Curr Opin Insect Sci*. 2018;27:82–8.
7. Coluzzi M. A Polytene Chromosome Analysis of the Anopheles gambiae Species Complex. *Science*. 2002;298:1415–8.
8. Pombi M, Caputo B, Simard F, Di Deco MA, Coluzzi M, della Torre A, et al. Chromosomal plasticity and evolutionary potential in the malaria vector Anopheles gambiae sensu stricto:

- insights from three decades of rare paracentric inversions. BMC Evol Biol. 2008;8:309.
9. Sharakhov I. A Microsatellite Map of the African Human Malaria Vector *Anopheles funestus*. J Hered. 2004;95:29–34.
10. Kirkpatrick M. How and why chromosome inversions evolve. PLoS Biol [Internet]. 2010;8. Available from: <http://dx.doi.org/10.1371/journal.pbio.1000501>
11. Ma J, Amos CI. Investigation of inversion polymorphisms in the human genome using principal components analysis. PLoS One. 2012;7:e40224.
12. Seich AI Basatena N-K, Hoggart CJ, Coin LJ, O'Reilly PF. The effect of genomic inversions on estimation of population genetic parameters from SNP data. Genetics. 2013;193:243–53.
13. Houle D, Márquez EJ. Linkage Disequilibrium and Inversion-Typing of the *Drosophila melanogaster* Genome Reference Panel. G3 . 2015;5:1695–701.
14. Coluzzi M, Sabatini A, Petrarca V, Di Deco MA. Chromosomal differentiation and adaptation to human environments in the *Anopheles gambiae* complex. Trans R Soc Trop Med Hyg. 1979;73:483–97.
15. Main BJ, Lee Y, Ferguson HM, Kreppel KS, Kihonda A, Govella NJ, et al. The Genetic Basis of Host Preference and Resting Behavior in the Major African Malaria Vector, *Anopheles arabiensis*. PLoS Genet. 2016;12:e1006303.
16. Rishikesh N, Di Deco MA, Petrarca V, Coluzzi M. Seasonal variations in indoor resting *Anopheles gambiae* and *Anopheles arabiensis* in Kaduna, Nigeria. Acta Trop. 1985;42:165–70.
17. Ayala D, Zhang S, Chateau M, Fouet C, Morlais I, Costantini C, et al. Association mapping desiccation resistance within chromosomal inversions in the African malaria vector *Anopheles gambiae*. Mol Ecol [Internet]. 2018; Available from: <http://dx.doi.org/10.1111/mec.14880>

- 402 18. Petrarca V, Nugud AD, Elkarim Ahmed MA, Haridi AM, Di Deco MA, Coluzzi M.  
403 Cytogenetics of the *Anopheles gambiae* complex in Sudan, with special reference to *An.*  
404 *arabensis*: relationships with East and West African populations. *Med Vet Entomol.*  
405 2000;14:149–64.
- 406 19. Gray EM, Rocca KAC, Costantini C, Besansky NJ. Inversion 2La is associated with  
407 enhanced desiccation resistance in *Anopheles gambiae*. *Malar J.* 2009;8:215.
- 408 20. Rocca KAC, Gray EM, Costantini C, Besansky NJ. 2La chromosomal inversion enhances  
409 thermal tolerance of *Anopheles gambiae* larvae. *Malar J.* 2009;8:147.
- 410 21. Fouet C, Gray E, Besansky NJ, Costantini C. Adaptation to aridity in the malaria mosquito  
411 *Anopheles gambiae*: chromosomal inversion polymorphism and body size influence resistance  
412 to desiccation. *PLoS One.* 2012;7:e34841.
- 413 22. Ayala D, Acevedo P, Pombi M, Dia I, Boccolini D, Costantini C, et al. Chromosome  
414 inversions and ecological plasticity in the main African malaria mosquitoes. *Evolution.*  
415 2017;71:686–701.
- 416 23. Cheng C, Tan JC, Hahn MW, Besansky NJ. Systems genetic analysis of inversion  
417 polymorphisms in the malaria mosquito. *Proc Natl Acad Sci U S A.* 2018;115:E7005–14.
- 418 24. Ayala D, Caro-Riaño H, Dujardin J-P, Rahola N, Simard F, Fontenille D. Chromosomal and  
419 environmental determinants of morphometric variation in natural populations of the malaria  
420 vector *Anopheles funestus* in Cameroon. *Infect Genet Evol.* 2011;11:940–7.
- 421 25. Riehle MM, Bukhari T, Gneme A, Guelbeogo WM, Coulibaly B, Fofana A, et al. The  
422 *Anopheles gambiae* 2La chromosome inversion is associated with susceptibility to *Plasmodium*  
423 *falciparum* in Africa. *Elife [Internet].* 2017;6. Available from: <http://dx.doi.org/10.7554/elif.25813>

- 424 26. Petrarca V, Beier JC. Intraspecific chromosomal polymorphism in the *Anopheles gambiae*  
425 complex as a factor affecting malaria transmission in the Kisumu area of Kenya. *Am J Trop Med*  
426 *Hyg.* 1992;46:229–37.
- 427 27. Gillies MT, De Meillon B. The Anophelinae of Africa South of the Sahara: (Ethiopian  
428 Zoogeographical Region). 1968.
- 429 28. Coetzee M, Fontenille D. Advances in the study of *Anopheles funestus*, a major vector of  
430 malaria in Africa. *Insect Biochem Mol Biol.* 2004;34:599–605.
- 431 29. Coetzee M, Koekemoer LL. Molecular systematics and insecticide resistance in the major  
432 African malaria vector *Anopheles funestus*. *Annu Rev Entomol.* 2013;58:393–412.
- 433 30. Dia I, Guelbeogo MW, Ayala D. Advances and Perspectives in the Study of the Malaria  
434 Mosquito *Anopheles funestus*. *Anopheles mosquitoes - New insights into malaria vectors.* 2013.
- 435 31. Zahar AR, World Health Organization. Vector Bionomics in the Epidemiology and Control of  
436 Malaria: The WHO African region & the southern WHO eastern Mediterranean region. 1984.
- 437 32. Menze BD, Riveron JM, Ibrahim SS, Irving H, Antonio-Nkondjio C, Awono-Ambene PH, et  
438 al. Multiple Insecticide Resistance in the Malaria Vector *Anopheles funestus* from Northern  
439 Cameroon Is Mediated by Metabolic Resistance Alongside Potential Target Site Insensitivity  
440 Mutations. *PLoS One.* 2016;11:e0163261.
- 441 33. Riveron JM, Ibrahim SS, Mulamba C, Djouaka R, Irving H, Wondji MJ, et al. Genome-Wide  
442 Transcription and Functional Analyses Reveal Heterogeneous Molecular Mechanisms Driving  
443 Pyrethroids Resistance in the Major Malaria Vector *Anopheles funestus* Across Africa. *G3:*  
444 *Genes|Genomes|Genetics.* 2017;g3.117.040147.
- 445 34. Ndo C, Kopya E, Donbou MA, Njiokou F, Awono-Ambene P, Wondji C. Elevated

446 Plasmodium infection rates and high pyrethroid resistance in major malaria vectors in a forested  
 447 area of Cameroon highlight challenges of malaria control. *Parasit Vectors* [Internet]. 2018;11.  
 448 Available from: <http://dx.doi.org/10.1186/s13071-018-2759-y>

449 35. Michel AP, Ingrassi MJ, Schemerhorn BJ, Kern M, Le Goff G, Coetzee M, et al. Rangewide  
 450 population genetic structure of the African malaria vector *Anopheles funestus*. *Mol Ecol*.  
 451 2005;14:4235–48.

452 36. Michel AP, Guelbeogo WM, Grushko O, Schemerhorn BJ, Kern M, Willard MB, et al.  
 453 Molecular differentiation between chromosomally defined incipient species of *Anopheles*  
 454 *funestus*. *Insect Mol Biol*. 2005;14:375–87.

455 37. Guelbeogo WM, Grushko O, Boccolini D, Ouédraogo PA, Besansky NJ, Sagnon NF, et al.  
 456 Chromosomal evidence of incipient speciation in the Afrotropical malaria mosquito *Anopheles*  
 457 *funestus*. *Med Vet Entomol*. 2005;19:458–69.

458 38. Costantini C, Sagnon N, Ilboudo-Sanogo E, Coluzzi M, Boccolini D. Chromosomal and  
 459 bionomic heterogeneities suggest incipient speciation in *Anopheles funestus* from Burkina Faso.  
 460 *Parassitologia*. 1999;41:595–611.

461 39. Guelbeogo WM, Sagnon N 'fale, Grushko O, Yameogo MA, Boccolini D, Besansky NJ, et al.  
 462 Seasonal distribution of *Anopheles funestus* chromosomal forms from Burkina Faso. *Malar J*.  
 463 2009;8:239.

464 40. Matthews BJ, Dudchenko O, Kingan SB, Koren S, Antoshechkin I, Crawford JE, et al.  
 465 Improved reference genome of *Aedes aegypti* informs arbovirus vector control. *Nature*.  
 466 2018;563:501–7.

467 41. Waterhouse RM, Seppey M, Simão FA, Manni M, Ioannidis P, Klioutchnikov G, et al.  
 468 BUSCO applications from quality assessments to gene prediction and phylogenomics. *Mol Biol*



469 Evol [Internet]. 2017; Available from: <http://dx.doi.org/10.1093/molbev/msx319>

470 42. Chin C-S, Alexander DH, Marks P, Klammer AA, Drake J, Heiner C, et al. Nonhybrid,  
471 finished microbial genome assemblies from long-read SMRT sequencing data. Nat Methods.  
472 2013;10:563–9.

473 43. Walker BJ, Abeel T, Shea T, Priest M, Abouelliel A, Sakthikumar S, et al. Pilon: an  
474 integrated tool for comprehensive microbial variant detection and genome assembly  
475 improvement. PLoS One. 2014;9:e112963.

476 44. Ewing B, Hillier L, Wendl MC, Green P. Base-calling of automated sequencer traces using  
477 phred. I. Accuracy assessment. Genome Res. 1998;8:175–85.

478 45. Waterhouse RM, Aganezov S, Anselmetti Y, Lee J, Ruzzante L, Reijnders MJ, et al.  
479 Leveraging evolutionary relationships to improve Anopheles genome assemblies [Internet].  
480 2018. Available from: <http://dx.doi.org/10.1101/434670>

481 46. Koren S, Walenz BP, Berlin K, Miller JR, Bergman NH, Phillippy AM. Canu: scalable and  
482 accurate long-read assembly via adaptivek-mer weighting and repeat separation. Genome Res.  
483 2017;27:722–36.

484 47. Langmead B, Salzberg SL. Fast gapped-read alignment with Bowtie 2. Nat Methods.  
485 2012;9:357–9.

486 48. English AC, Richards S, Han Y, Wang M, Vee V, Qu J, et al. Mind the gap: upgrading  
487 genomes with Pacific Biosciences RS long-read sequencing technology. PLoS One.  
488 2012;7:e47768.

489 49. Kurtz S, Phillippy A, Delcher AL, Smoot M, Shumway M, Antonescu C, et al. Versatile and  
490 open software for comparing large genomes. Genome Biol. 2004;5:R12.

491 50. Krzywinski M, Schein J, Birol I, Connors J, Gascoyne R, Horsman D, et al. Circos: an  
492 information aesthetic for comparative genomics. *Genome Res.* 2009;19:1639–45.

493 51. Koren S, Rhie A, Walenz BP, Diltthey AT, Bickhart DM, Kingan SB, et al. De novo assembly  
494 of haplotype-resolved genomes with trio binning. *Nat Biotechnol* [Internet]. 2018; Available from:  
495 <http://dx.doi.org/10.1038/nbt.4277>

496 52. Li H, Durbin R. Fast and accurate long-read alignment with Burrows-Wheeler transform.  
497 *Bioinformatics.* 2010;26:589–95.

498 53. Bishara A, Liu Y, Weng Z, Kashef-Haghighi D, Newburger DE, West R, et al. Read clouds  
499 uncover variation in complex regions of the human genome. *Genome Res.* 2015;25:1570–80.

500 54. Wood DE, Salzberg SL. Kraken: ultrafast metagenomic sequence classification using exact  
501 alignments. *Genome Biol.* 2014;15:R46.

502 55. Sedlazeck FJ, Rescheneder P, Smolka M, Fang H, Nattestad M, von Haeseler A, et al.  
503 Accurate detection of complex structural variations using single-molecule sequencing. *Nat*  
504 *Methods.* 2018;15:461–8.

505 56. Kim D, Langmead B, Salzberg SL. HISAT: a fast spliced aligner with low memory  
506 requirements. *Nat Methods.* 2015;12:357–60.

507 57. Grabherr MG, Haas BJ, Yassour M, Levin JZ, Thompson DA, Amit I, et al. Full-length  
508 transcriptome assembly from RNA-Seq data without a reference genome. *Nat Biotechnol.*  
509 2011;29:644–52.

510 58. Wu TD, Watanabe CK. GMAP: a genomic mapping and alignment program for mRNA and  
511 EST sequences. *Bioinformatics.* 2005;21:1859–75.

512 59. Durand NC, Robinson JT, Shamim MS, Machol I, Mesirov JP, Lander ES, et al. Juicebox

513 Provides a Visualization System for Hi-C Contact Maps with Unlimited Zoom. Cell Syst.  
 514 2016;3:99–101.

515 60. Cabanettes F, Klopp C. D-GENIES: dot plot large genomes in an interactive, efficient and  
 516 simple way. PeerJ. 2018;6:e4958.

517
